# Supplementary material for: Loss of COX5B inhibits proliferation and promotes senescence via mitochondrial dysfunction in breast cancer
Source: PubMed Central journal article supplement (PMC4791237; doi:10.18632/oncotarget.6222), 2015-10-25
Supplement: oncotarget-06-43363-s001.pdf [file oncotarget-06-43363-s001.pdf]

# Loss of COX5B inhibits proliferation and promotes senescence via mitochondrial dysfunction in breast cancer

## Supplementary Material

COX5B\_HUMAN (100%) 13,695.7 Da

Cytochrome c oxidase subunit 5B, mitochondrial OS=Homo sapiens GN=COX5B PE=1 SV=2

```
MASRLLRGAG TLAAQALRAR GPSGAAAMRS MASGGGVPTD EEQATGLERE  
IMLAAKKGLD PYNVLAPKGA SGTREDPNLV PSISNKRIVG CICEEDNTSV  
VFWLHKGEA QRCPRCGAHY KLVPQQLAH
```

Figure S1: The peptide sequences of COX5B

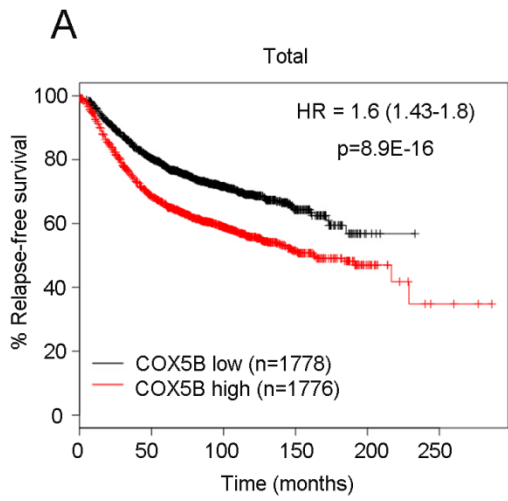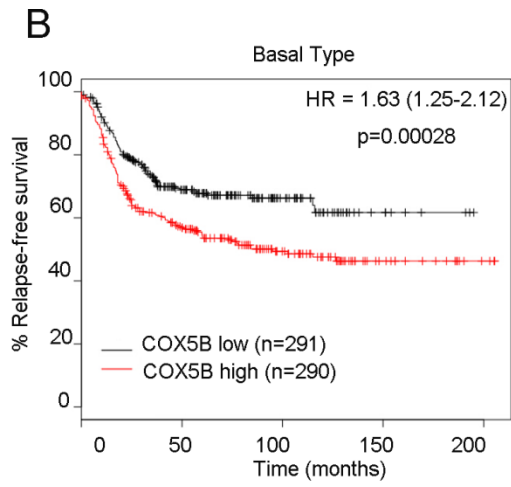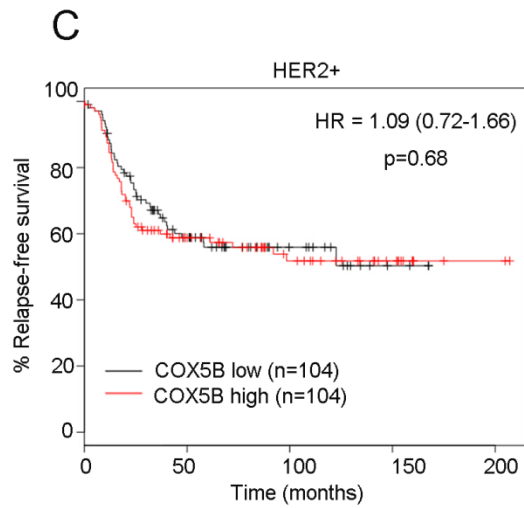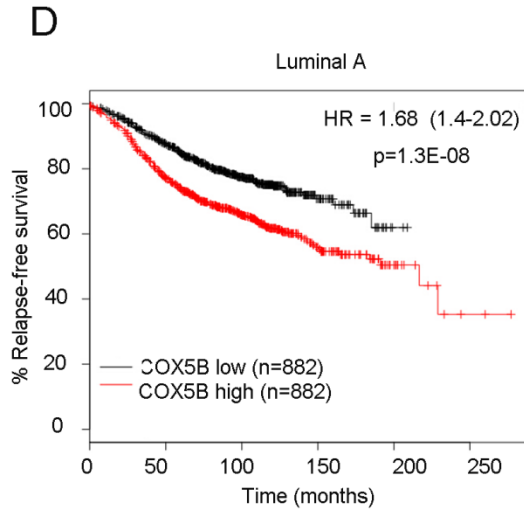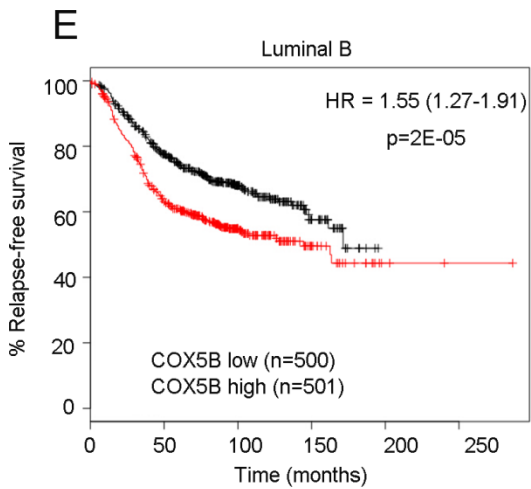

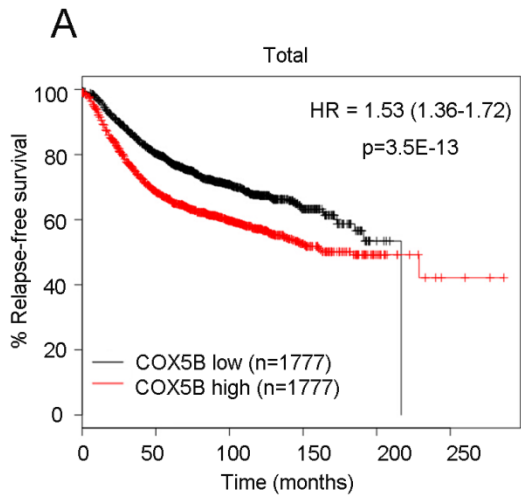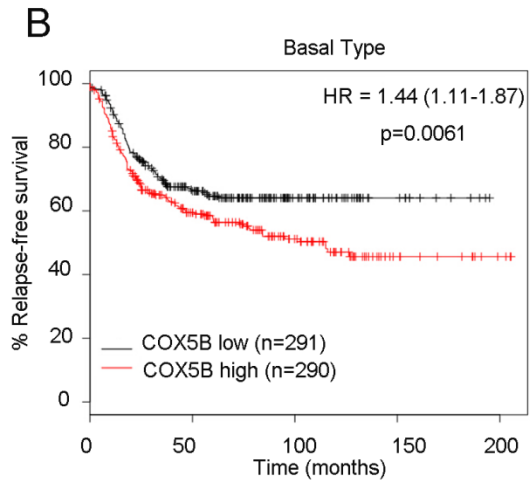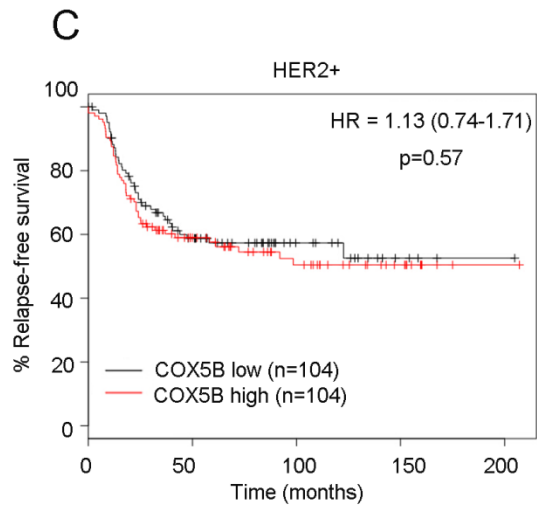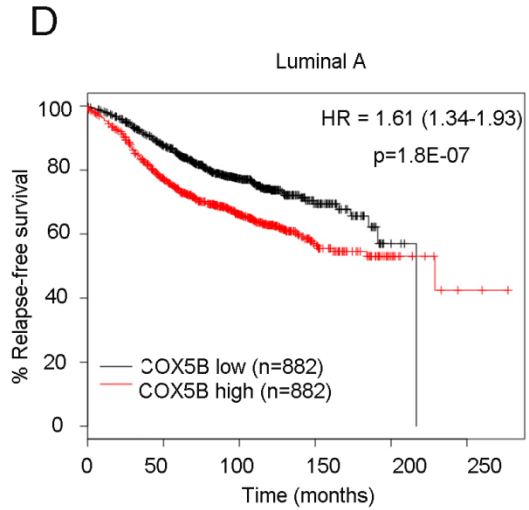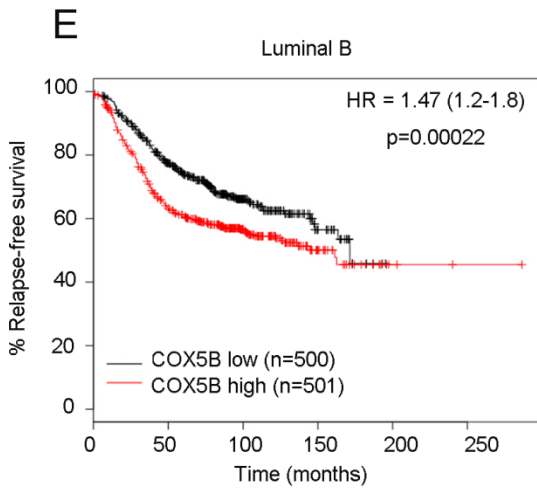

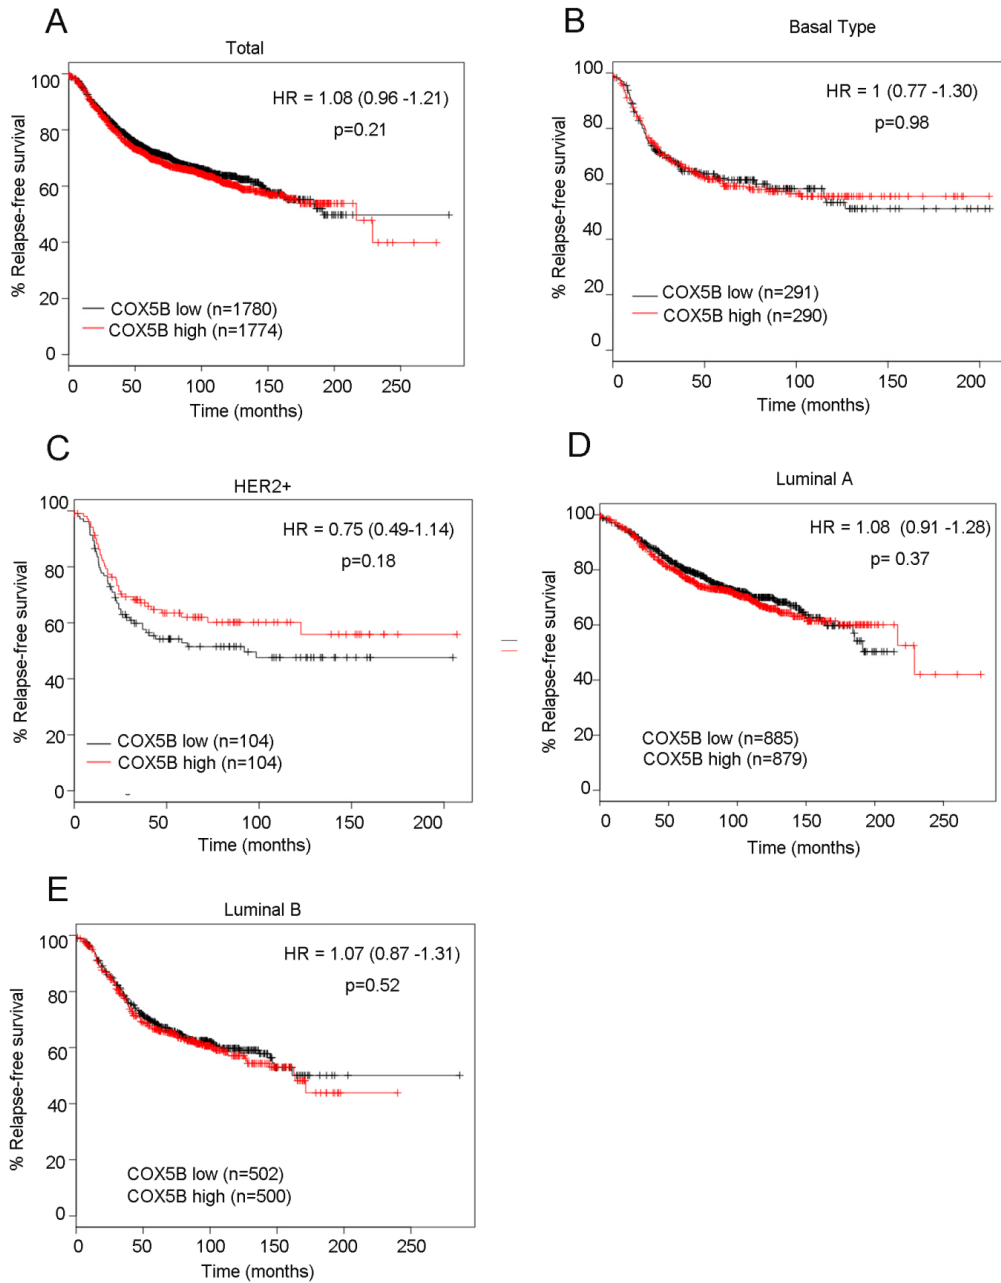

**Supplementary Figure S2-4**

The survival analysis of COX5B expression in patients with indicated subtype with other probes of COX5B (211025\_x\_at, 213735\_s\_at, 213736\_at) using the online Kaplan-Meier plotting tool (Total; Basal Type; Her2+; Lumina A; Lumina B)

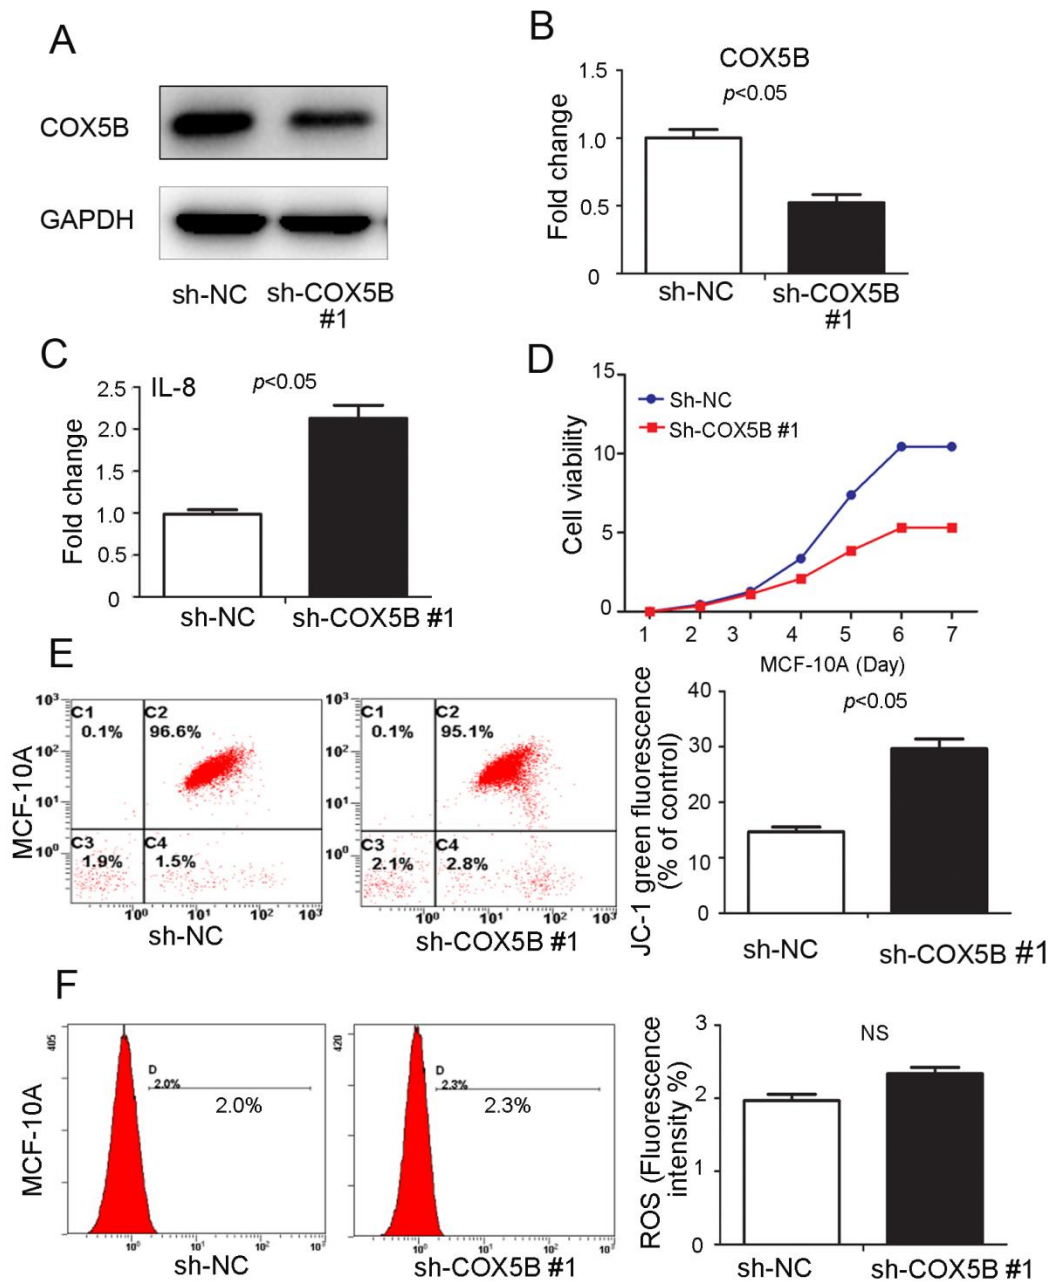

### Supplementary Figure S5 Down-regulation of COX5B in MCF10A

(A B) The protein and mRNA expression of COX5B in MCF10A (sh-NC and sh-COX5B #1). (C) IL-8 expression analyzed by Real-time PCR. (D) The proliferation of MCF10A by CCK8. (E) The depolarization of MMP of MCF10A. (F) FACS analysis of mitochondrial ROS.

Supplementary Table 1: Primer sequences

| Gene name | primer  | sequence                       |
|-----------|---------|--------------------------------|
| COX5B     | Foward  | 5'-GTTTTGGCTGCACAAAGGGC-3'     |
|           | Reverse | 5'-CTGGGGCACCAGCTTGTAAT-3'     |
| CXCL1     | Foward  | 5'-TCGAAAAGATGCTGAACAGTGAC-3'  |
|           | Reverse | 5'-CCAGATTGAACTAACTTGGGGTTG-3' |
| CXCL16    | Foward  | 5'-ATGCTTACTCGGGGATTGTG-3'     |
|           | Reverse | 5'-GTGGTTTCATTGGGACGAGT-3'     |
| CXCL18    | Foward  | 5'-AGTGGCTCACGCCTGTAATC-3'     |
|           | Reverse | 5'-TCTACCTCCGGAGTGCAAGT-3'     |
| IL-8      | Foward  | 5'-AGGGTTGCCAGATGCAATAC-3'     |
|           | Reverse | 5'-CCTTGGCCTCAATTTTGCTA-3'     |
| IL-10     | Foward  | 5'-CCACGTGTTGAGATCATTGCT-3'    |
|           | Reverse | 5'-TGCATCGATTTTGCTCCCCT-3'     |
| CSF2      | Foward  | 5'-GCGTCTCCTGAACCTGAGTAG-3'    |
|           | Reverse | 5'-TCGGCTCCTGGAGGTCAAAC-3'     |
| CES1      | Foward  | 5'-AAGCAGGAGTTTGGCTGGTT-3'     |
|           | Reverse | 5'-GCTCCAGCATCTCTGTGGTT-3'     |
| ATP6V0    | Foward  | 5'-TGGCACTGAATTGAGCAAAG-3'     |
|           | Reverse | 5'-TCACGCTCGTAAAACACGTC-3'     |
| EPHB6     | Foward  | 5'-CAGCCTAGAAGACCTGCCTG-3'     |
|           | Reverse | 5'-CCATCGGAGGGTTGGGTTTG-3'     |
| JAG1      | Foward  | 5'-TGTGAAATTGCTGAGCACGC-3'     |
|           | Reverse | 5'-ACACAAGGTTTGGCCTCACA-3'     |
| CALB2     | Foward  | 5'-ATGGCAAATTGGGCCTCTCA-3'     |
|           | Reverse | 5'-GCCGCTTCTATCCTTGTCGT-3'     |
| GPR110    | Foward  | 5'-CTGGAAAGGGATTCCAGTGA-3'     |
|           | Reverse | 5'-GGTCCATTGACCTGAGCATT-3'     |
| GAPDH     | Foward  | 5'-GGTGGTCTCCTCTGACTTCAACA-3'  |
|           | Reverse | 5'-GTTGCTGTAGCCAAATTCGTTGT-3'  |
